# Supplementary material
Source: HighWire-hosted journal article supplement (https://fg.bmj.com/highwire/filestream/145929/field_highwire_adjunct_files/0/flgastro-2022-102221supp001_data_supplement.pdf)
Supplement: flgastro-2022-102221supp001_data_supplement.pdf [file flgastro-2022-102221supp001_data_supplement.pdf]

**Supplementary information for**

**Real-world evidence of long-term survival and healthcare resource use in patients with hepatic encephalopathy receiving rifaximin- $\alpha$  treatment: a retrospective observational extension study with long term follow-up (IMPRESS II)**

Richard J Aspinall, Mark Hudson, Stephen D Ryder, Paul Richardson, Elizabeth Farrington, Mark Wright, Robert T Przemioslo, Francisco Perez, Melanie Kent, Roland Henrar, Joe Hickey, and Debbie L Shawcross

**Supplementary Table 1. Number of patients previously receiving a liver transplant prior to initiating treatment with rifaximin**

| <b>Received a liver transplant<br/>pre-rifaximin initiation</b> | <b>n (%=127)</b> |
|-----------------------------------------------------------------|------------------|
| Yes                                                             | 2 (2%)           |
| No                                                              | 125 (98%)        |
| Not recorded                                                    | 11               |

Supplementary Table 2. Summary of treatment discontinuations

| Reasons for treatment discontinuation | 0-5 years, excluding death and liver transplant<br>(n, %=26) |         |
|---------------------------------------|--------------------------------------------------------------|---------|
|                                       | 1-5 years (n, %=52)                                          |         |
| Death                                 | 40 (77%)                                                     | -       |
| Encephalopathy resolved               | 1 (2%)                                                       | 6 (23%) |
| Moved to end of life care             | 1 (2%)                                                       | 4 (15%) |
| Clinical improvement                  | 3 (6%)                                                       | 4 (15%) |
| Liver Transplant                      | 3 (6%)                                                       | -       |
| Course completed                      | 1 (2%)                                                       | 3 (12%) |
| GP decision                           | 1 (2%)                                                       | 3 (12%) |
| Alcohol abuse                         | -                                                            | 1 (4%)  |
| No improvement in symptoms            | -                                                            | 1 (4%)  |
| Prescribing issue                     | 1 (2%)                                                       | 1 (4%)  |
| Rash                                  | -                                                            | 1 (4%)  |
| Treatment interruption                | 1 (2%)                                                       | 1 (4%)  |
| Consultant decision                   | -                                                            | 1 (4%)  |
| Not recorded                          | 8                                                            | 13      |

Key: GP – general practitioner.

**Supplementary Table 3. Concomitant administration of laxatives and enemas between 1–5 years post-index**

| <b>Medications**</b> | <b>number of patients (%=98*)</b> | <b>N courses prescribed</b> |
|----------------------|-----------------------------------|-----------------------------|
| Lactulose            | 41 (42%)                          | 44                          |
| Movicol              | 4 (4%)                            | 4                           |
| Senna                | 7 (7%)                            | 7                           |
| Macrogol             | 2 (2%)                            | 2                           |
| Sodium picosulphate  | 1 (1%)                            | 1                           |
| Docusate             | 6 (6%)                            | 6                           |
| Laxido               | 2 (2%)                            | 3                           |
| Other laxative       | 1 (1%)                            | 1                           |
| Phosphate enema      | 5 (5%)                            | 12                          |
| Not recorded         | 52 (53%)                          |                             |

\*total n is the number of patients that survived past 12 months  
\*\*categories are not mutually exclusive

Supplementary Table 4. Hospital resource use 1–2 and 2–5 years post-RFX initiation

|                                                                                        | Resource timeline   |                     |
|----------------------------------------------------------------------------------------|---------------------|---------------------|
|                                                                                        | 1-2 years           | 2-5 years           |
| <b>Total liver-related admissions/visits recorded</b>                                  |                     |                     |
| ED visits                                                                              | 44                  | 40                  |
| Inpatient admissions                                                                   | 76                  | 115                 |
| ICU admissions                                                                         | 3                   | 0                   |
| Outpatient visits                                                                      | 265                 | 444                 |
| <b>Total all-cause admissions/visits recorded</b>                                      |                     |                     |
| ED visits                                                                              | 68                  | 87                  |
| Inpatient admissions                                                                   | 131                 | 176                 |
| ICU admissions                                                                         | 3                   | 2                   |
| Outpatient visits                                                                      | 381                 | 742                 |
| <b>Liver-related resource use per patient per year - median (range)</b>                | n=98                | n=78                |
| ED visits                                                                              | 0 (0–11.4)          | 0 (0–17.8)          |
| Inpatient admissions                                                                   | 0 (0–10.0)          | 0 (0–17.8)          |
| ICU admissions                                                                         | 0 (0–1.0)           | 0 (0–0.0)           |
| Outpatient visits                                                                      | 2.4 (0–13.3)        | 2.2 (0–27.4)        |
| <b>All-cause resource use per patient per year - median (range)</b>                    |                     |                     |
| ED visits                                                                              | 0 (0–12.2)          | 0 (0–17.8)          |
| Inpatient admissions                                                                   | 0 (0–11.6)          | 0.3 (0–17.8)        |
| ICU admissions                                                                         | 0 (0–1.0)           | 0 (0–0.6)           |
| Outpatient visits                                                                      | 3.0 (0–22.9)        | 3.1 (0–28.4)        |
| <b>ED – discharge/transfer destination after admission (liver-related admissions)</b>  | (n, % n=44)         | (n, % n=40)         |
| Inpatient admission                                                                    | 34 (77%)            | 38 (95%)            |
| ICU admission                                                                          | 1 (2%)              | 0 (0%)              |
| Discharged home                                                                        | 9 (20%)             | 2 (5%)              |
| <b>ED – discharge/transfer destination after admission (all-cause admissions)</b>      | (n events, % n=68)  | (n events, % n=87)  |
| Inpatient admission                                                                    | 49 (72%)            | 57 (66%)            |
| ICU admission                                                                          | 1 (1%)              | 1 (1%)              |
| Discharged home                                                                        | 18 (26%)            | 29 (33%)            |
| <b>Inpatient admission – discharge/transfer destination (liver-related admissions)</b> | (n events, % n=76)  | (n events, % n=115) |
| Discharged home                                                                        | 72 (95%)            | 108 (94%)           |
| ICU admission                                                                          | 1 (1%)              | 0 (0%)              |
| Patient died                                                                           | 3 (4%)              | 7 (6%)              |
| <b>Inpatient admission – discharge/transfer destination (all-cause admissions)</b>     | (n events, % n=131) | (n events, % n=176) |
| Discharged home                                                                        | 122 (93%)           | 167 (95%)           |
| ICU admission                                                                          | 2 (2%)              | 1 (1%)              |
| Patient died                                                                           | 7 (5%)              | 8 (5%)              |

Key: ED – emergency department, ICU – intensive care unit.
